# Supplementary material for: Deep neural network provides personalized treatment recommendations for de novo metastatic breast cancer patients
Source: PubMed Central journal article supplement (PMC11632994; doi:10.7150/jca.101293), 2024-10-28
Supplement: jcav15p6668s1.pdf [file jcav15p6668s1.pdf]

**Supplement Figure 1** The basic components of the deep neural network

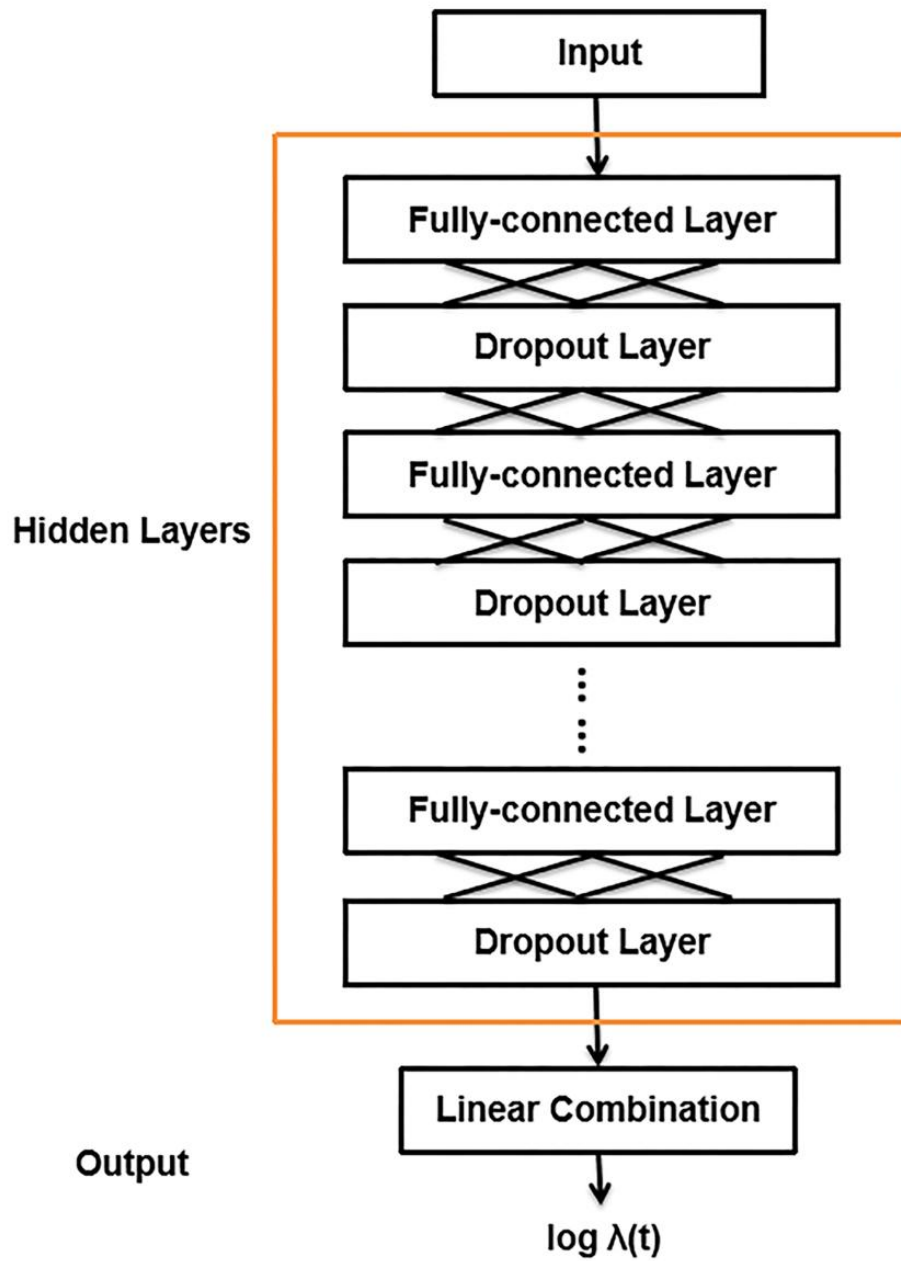

**Supplement Figure 2.** The deep neural network was visualized using the “Netron” tool.

A. Visualization of deep neural network model 1; B. Visualization of deep neural network model 2.

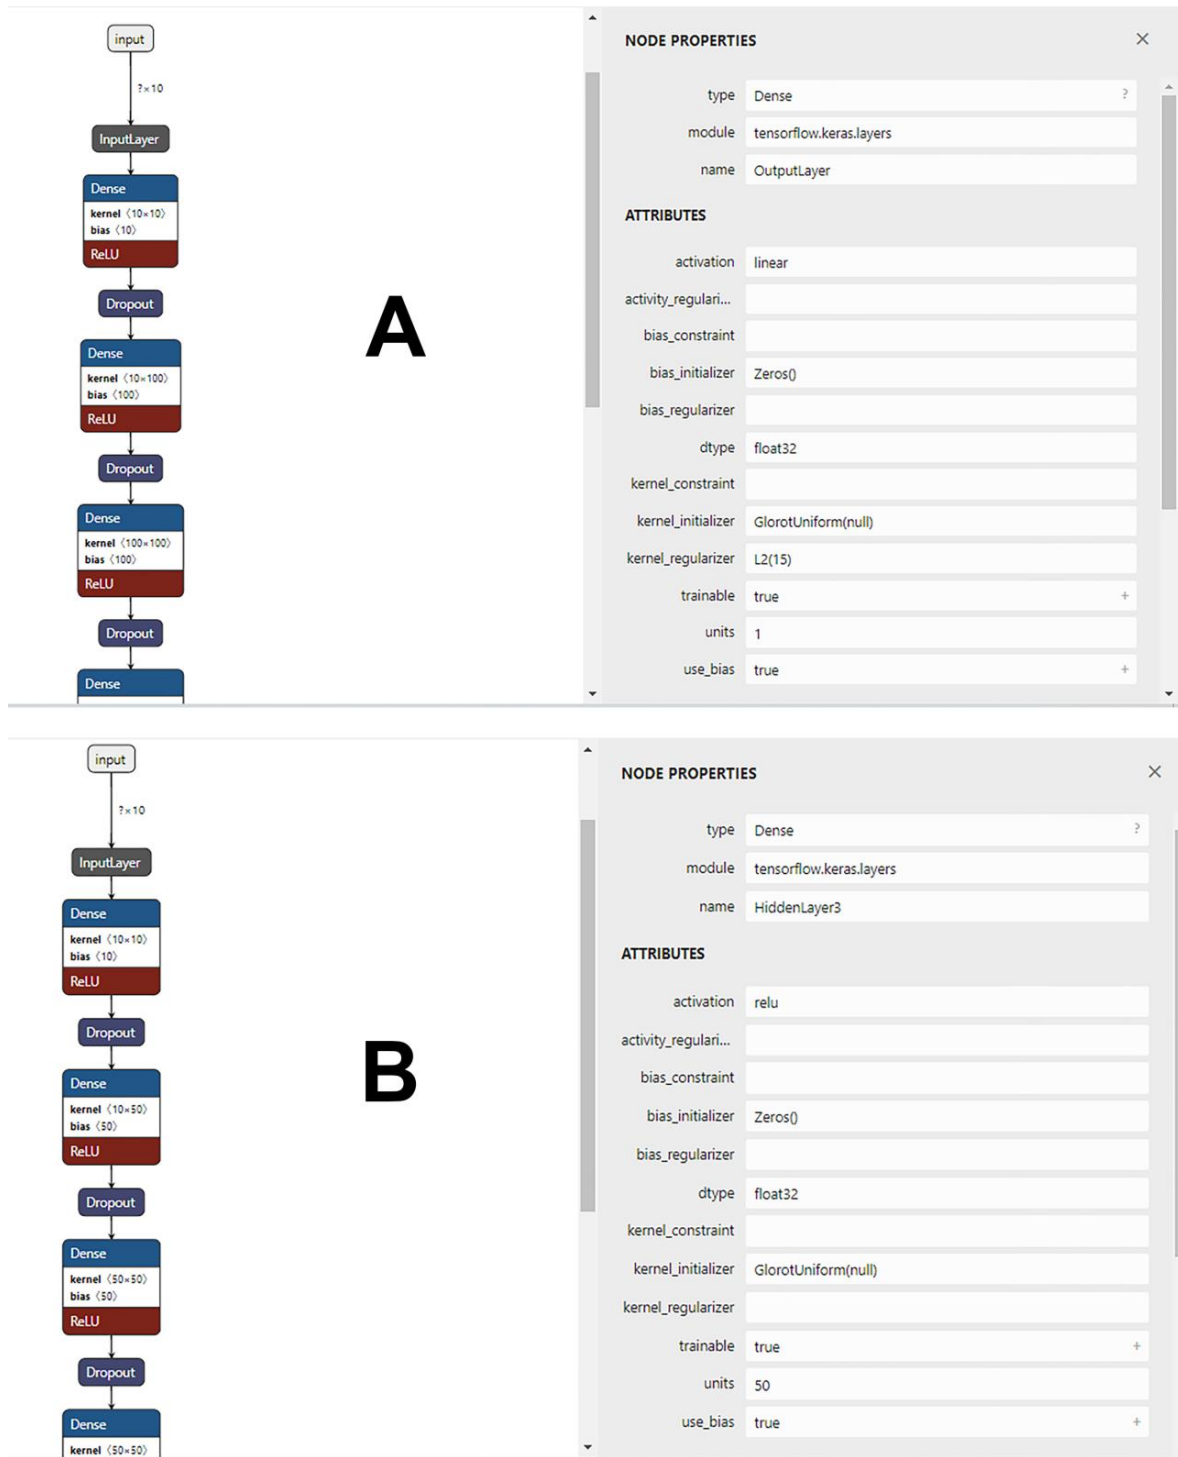

**Supplement Table 1. Comparison of patient characteristics in the train and test sets of the deep neural network model 1**

|                          | Train set |        | Test set |        | P Value      |
|--------------------------|-----------|--------|----------|--------|--------------|
|                          | N=7094    | %      | N=3041   | %      |              |
| <b>Age at diagnosis</b>  |           |        |          |        | <b>0.145</b> |
| <40                      | 810       | 11.42% | 313      | 10.29% |              |
| 40-49                    | 1232      | 17.37% | 519      | 17.07% |              |
| 50-59                    | 1971      | 27.78% | 885      | 29.10% |              |
| 60-69                    | 1846      | 26.02% | 837      | 27.52% |              |
| 70-79                    | 944       | 13.31% | 376      | 12.36% |              |
| ≥80                      | 291       | 4.10%  | 111      | 3.65%  |              |
| <b>Subtype</b>           |           |        |          |        | <b>0.630</b> |
| HR+/HER2-                | 3373      | 47.55% | 1468     | 48.27% |              |
| HR+/HER2+                | 1394      | 19.65% | 557      | 18.32% |              |
| HR-/HER2+                | 796       | 11.22% | 347      | 11.41% |              |
| HR-/HER2-                | 1022      | 14.41% | 452      | 14.86% |              |
| Unknown                  | 509       | 7.18%  | 217      | 7.14%  |              |
| <b>Race</b>              |           |        |          |        | <b>0.566</b> |
| White                    | 5221      | 73.60% | 2215     | 72.84% |              |
| Black                    | 1069      | 15.07% | 490      | 16.11% |              |
| Others                   | 766       | 10.80% | 318      | 10.46% |              |
| Unknown                  | 38        | 0.54%  | 18       | 0.59%  |              |
| <b>Histological type</b> |           |        |          |        | <b>0.548</b> |
| IDC                      | 5211      | 73.46% | 2231     | 73.36% |              |
| ILC                      | 581       | 8.19%  | 248      | 8.16%  |              |
| Mixed                    | 381       | 5.37%  | 146      | 4.80%  |              |
| Others                   | 921       | 12.98% | 416      | 13.68% |              |
| <b>Marital status</b>    |           |        |          |        | <b>0.681</b> |
| Married                  | 3382      | 47.67% | 1449     | 47.65% |              |
| Unmarried                | 3396      | 47.87% | 1468     | 48.27% |              |
| Unknown                  | 316       | 4.45%  | 124      | 4.08%  |              |
| <b>T stage</b>           |           |        |          |        | <b>0.347</b> |
| T1                       | 686       | 9.67%  | 288      | 9.47%  |              |
| T2                       | 2045      | 28.83% | 844      | 27.75% |              |
| T3                       | 1185      | 16.70% | 479      | 15.75% |              |
| T4                       | 2290      | 32.28% | 1028     | 33.80% |              |
| Unknown                  | 888       | 12.52% | 402      | 13.22% |              |

|                                                         |      |        |      |        |              |
|---------------------------------------------------------|------|--------|------|--------|--------------|
| <b>Grade</b>                                            |      |        |      |        | <b>0.673</b> |
| I; Well differentiated                                  | 369  | 5.20%  | 151  | 4.97%  |              |
| II; Moderately differentiated                           | 2251 | 31.73% | 992  | 32.62% |              |
| III/IV; Poorly differentiated                           | 3077 | 43.37% | 1286 | 42.29% |              |
| Unknown                                                 | 1397 | 19.69% | 612  | 20.12% |              |
| <b>Median household income<br/>(inflation adjusted)</b> |      |        |      |        | <b>0.481</b> |
| <50,000\$                                               | 826  | 11.64% | 365  | 12.00% |              |
| 50,000-59,999\$                                         | 1100 | 15.51% | 479  | 15.75% |              |
| 60,000-69,999\$                                         | 2444 | 34.45% | 999  | 32.85% |              |
| ≥70,000\$                                               | 2724 | 38.40% | 1198 | 39.39% |              |
| <b>Surgery</b>                                          |      |        |      |        | <b>0.434</b> |
| No                                                      | 5307 | 74.81% | 2298 | 75.57% |              |
| Yes                                                     | 1787 | 25.19% | 743  | 24.43% |              |
| <b>Distant metastases</b>                               |      |        |      |        | <b>0.135</b> |
| Bone only                                               | 2322 | 32.73% | 1025 | 33.71% |              |
| Liver only                                              | 599  | 8.44%  | 244  | 8.02%  |              |
| Lung only                                               | 632  | 8.91%  | 262  | 8.62%  |              |
| Brain only                                              | 77   | 1.09%  | 37   | 1.22%  |              |
| Bone+Liver                                              | 702  | 9.90%  | 263  | 8.65%  |              |
| Bone+Lung                                               | 521  | 7.34%  | 249  | 8.19%  |              |
| Bone+Brain                                              | 117  | 1.65%  | 37   | 1.22%  |              |
| Bone+Liver+Lung                                         | 354  | 4.99%  | 133  | 4.37%  |              |
| Liver+Lung                                              | 149  | 2.10%  | 69   | 2.27%  |              |
| Brain+Other                                             | 360  | 5.07%  | 186  | 6.12%  |              |
| Other metastases                                        | 1261 | 17.78% | 533  | 17.53% |              |

---

Brain+other: cases of brain metastases combined with other metastases except for the bone+brain, e.g. brain+liver etc. Other metastases: other cases of metastases than those listed in the table.

**Supplement Table 2. Comparison of patient characteristics in the train and test sets of the deep neural network model 2**

|                               | Train set |        | Test set |        | P Value      |
|-------------------------------|-----------|--------|----------|--------|--------------|
|                               | N=1787    | %      | N=743    | %      |              |
| <b>Age at diagnosis</b>       |           |        |          |        | <b>0.716</b> |
| <40                           | 270       | 15.11% | 112      | 15.07% |              |
| 40-49                         | 368       | 20.59% | 155      | 20.86% |              |
| 50-59                         | 488       | 27.31% | 206      | 27.73% |              |
| 60-69                         | 410       | 22.94% | 183      | 24.63% |              |
| 70-79                         | 208       | 11.64% | 71       | 9.56%  |              |
| ≥80                           | 43        | 2.41%  | 16       | 2.15%  |              |
| <b>Subtype</b>                |           |        |          |        | <b>0.515</b> |
| HR+/HER2-                     | 795       | 44.49% | 353      | 47.51% |              |
| HR+/HER2+                     | 389       | 21.77% | 140      | 18.84% |              |
| HR-/HER2+                     | 223       | 12.48% | 93       | 12.52% |              |
| HR-/HER2-                     | 314       | 17.57% | 131      | 17.63% |              |
| Unknown                       | 66        | 3.69%  | 26       | 3.50%  |              |
| <b>Race</b>                   |           |        |          |        | <b>0.775</b> |
| White                         | 1313      | 73.48% | 542      | 72.95% |              |
| Black                         | 260       | 14.55% | 115      | 15.48% |              |
| Others                        | 208       | 11.64% | 85       | 11.44% |              |
| Unknown                       | 6         | 0.34%  | 1        | 0.13%  |              |
| <b>Histological type</b>      |           |        |          |        | <b>0.056</b> |
| IDC                           | 1465      | 81.98% | 591      | 79.54% |              |
| ILC                           | 97        | 5.43%  | 51       | 6.86%  |              |
| Mixed                         | 123       | 6.88%  | 42       | 5.65%  |              |
| Others                        | 102       | 5.71%  | 59       | 7.94%  |              |
| <b>Marital status</b>         |           |        |          |        | <b>0.579</b> |
| Married                       | 945       | 52.88% | 376      | 50.61% |              |
| Unmarried                     | 768       | 42.98% | 335      | 45.09% |              |
| Unknown                       | 74        | 4.14%  | 32       | 4.31%  |              |
| <b>T stage</b>                |           |        |          |        | <b>0.968</b> |
| T1                            | 193       | 10.80% | 77       | 10.36% |              |
| T2                            | 650       | 36.37% | 277      | 37.28% |              |
| T3                            | 355       | 19.87% | 140      | 18.84% |              |
| T4                            | 533       | 29.83% | 226      | 30.42% |              |
| Unknown                       | 56        | 3.13%  | 23       | 3.10%  |              |
| <b>Grade</b>                  |           |        |          |        | <b>0.572</b> |
| I; Well differentiated        | 79        | 4.42%  | 33       | 4.44%  |              |
| II; Moderately differentiated | 577       | 32.29% | 261      | 35.13% |              |
| III/IV; Poorly differentiated | 996       | 55.74% | 397      | 53.43% |              |

|                                                         |     |        |     |        |              |
|---------------------------------------------------------|-----|--------|-----|--------|--------------|
| Unknown                                                 | 135 | 7.55%  | 52  | 7.00%  |              |
| <b>Median household income<br/>(inflation adjusted)</b> |     |        |     |        | <b>0.453</b> |
| <50,000\$                                               | 241 | 13.49% | 106 | 14.27% |              |
| 50,000-59,999\$                                         | 312 | 17.46% | 119 | 16.02% |              |
| 60,000-69,999\$                                         | 614 | 34.36% | 240 | 32.30% |              |
| ≥70,000\$                                               | 620 | 34.70% | 278 | 37.42% |              |
| <b>Neoadjuvant systemic therapy</b>                     |     |        |     |        | <b>0.837</b> |
| No                                                      | 885 | 49.52% | 372 | 50.07% |              |
| Yes                                                     | 902 | 50.48% | 371 | 49.93% |              |
| <b>Distant metastases</b>                               |     |        |     |        | <b>0.323</b> |
| Bone only                                               | 730 | 40.85% | 327 | 44.01% |              |
| Liver only                                              | 223 | 12.48% | 91  | 12.25% |              |
| Lung only                                               | 222 | 12.42% | 82  | 11.04% |              |
| Brain only                                              | 23  | 1.29%  | 9   | 1.21%  |              |
| Bone+Liver                                              | 122 | 6.83%  | 38  | 5.11%  |              |
| Bone+Lung                                               | 81  | 4.53%  | 45  | 6.06%  |              |
| Bone+Brain                                              | 13  | 0.73%  | 4   | 0.54%  |              |
| Bone+Liver+Lung                                         | 44  | 2.46%  | 13  | 1.75%  |              |
| Liver+Lung                                              | 43  | 2.41%  | 10  | 1.35%  |              |
| Brain+Other                                             | 38  | 2.13%  | 16  | 2.15%  |              |
| Other metastases                                        | 248 | 13.88% | 108 | 14.54% |              |

---

Brain+other: cases of brain metastases combined with other metastases except for the bone+brain, e.g. brain+liver etc. Other metastases: other cases of metastases than those listed in the table.

**Supplement Table 3: Baseline characteristics of de novo metastatic breast cancer (dnMBC) patients included from SEER data cohort**

|                          | CW     |        | NS     |        | SC     |        | P Value          |
|--------------------------|--------|--------|--------|--------|--------|--------|------------------|
|                          | N=7605 | %      | N=1273 | %      | N=1257 | %      |                  |
| <b>Age at diagnosis</b>  |        |        |        |        |        |        | <b>&lt;0.001</b> |
| <40                      | 741    | 9.74%  | 236    | 18.54% | 146    | 11.61% |                  |
| 40-49                    | 1228   | 16.15% | 292    | 22.94% | 231    | 18.38% |                  |
| 50-59                    | 2162   | 28.43% | 372    | 29.22% | 322    | 25.62% |                  |
| 60-69                    | 2090   | 27.48% | 253    | 19.87% | 340    | 27.05% |                  |
| 70-79                    | 1041   | 13.69% | 106    | 8.33%  | 173    | 13.76% |                  |
| ≥80                      | 343    | 4.51%  | 14     | 1.10%  | 45     | 3.58%  |                  |
| <b>Subtype</b>           |        |        |        |        |        |        | <b>&lt;0.001</b> |
| HR+/HER2-                | 3693   | 48.56% | 532    | 41.79% | 625    | 49.72% |                  |
| HR+/HER2+                | 1422   | 18.70% | 307    | 24.12% | 222    | 17.66% |                  |
| HR-/HER2+                | 827    | 10.87% | 176    | 13.83% | 140    | 11.14% |                  |
| HR-/HER2-                | 1029   | 13.53% | 227    | 17.83% | 218    | 17.34% |                  |
| Unknown                  | 634    | 8.34%  | 40     | 3.14%  | 52     | 4.14%  |                  |
| <b>Race</b>              |        |        |        |        |        |        | <b>0.06</b>      |
| White                    | 5581   | 73.39% | 924    | 72.58% | 931    | 74.07% |                  |
| Black                    | 1184   | 15.57% | 182    | 14.30% | 193    | 15.35% |                  |
| Others                   | 791    | 10.40% | 163    | 12.80% | 130    | 10.34% |                  |
| Unknown                  | 49     | 0.64%  | 4      | 0.31%  | 3      | 0.24%  |                  |
| <b>Histological type</b> |        |        |        |        |        |        | <b>&lt;0.001</b> |
| IDC                      | 5386   | 70.82% | 1072   | 84.21% | 984    | 78.28% |                  |
| ILC                      | 681    | 8.95%  | 52     | 4.08%  | 96     | 7.64%  |                  |
| Mixed                    | 362    | 4.76%  | 69     | 5.42%  | 96     | 7.64%  |                  |
| Others                   | 1176   | 15.46% | 80     | 6.28%  | 81     | 6.44%  |                  |
| <b>Marital status</b>    |        |        |        |        |        |        | <b>&lt;0.001</b> |
| Married                  | 3510   | 46.15% | 666    | 52.32% | 655    | 52.11% |                  |
| Unmarried                | 3761   | 49.45% | 555    | 43.60% | 548    | 43.60% |                  |
| Unknown                  | 334    | 4.39%  | 52     | 4.08%  | 54     | 4.30%  |                  |
| <b>T stage</b>           |        |        |        |        |        |        | <b>&lt;0.001</b> |
| T1                       | 704    | 9.26%  | 112    | 8.80%  | 158    | 12.57% |                  |
| T2                       | 1962   | 25.80% | 352    | 27.65% | 575    | 45.74% |                  |
| T3                       | 1169   | 15.37% | 271    | 21.29% | 224    | 17.82% |                  |
| T4                       | 2559   | 33.65% | 504    | 39.59% | 255    | 20.29% |                  |
| Unknown                  | 1211   | 15.92% | 34     | 2.67%  | 45     | 3.58%  |                  |
| <b>N stage</b>           |        |        |        |        |        |        | <b>&lt;0.001</b> |
| N0                       | 1426   | 18.75% | 152    | 11.94% | 212    | 16.87% |                  |
| N1                       | 3811   | 50.11% | 574    | 45.09% | 421    | 33.49% |                  |
| N2                       | 597    | 7.85%  | 221    | 17.36% | 279    | 22.20% |                  |
| N3                       | 1112   | 14.62% | 308    | 24.19% | 313    | 24.90% |                  |

|                                                         |      |        |     |        |     |        |                  |
|---------------------------------------------------------|------|--------|-----|--------|-----|--------|------------------|
| Unknown                                                 | 659  | 8.67%  | 18  | 1.41%  | 32  | 2.55%  |                  |
| <b>Grade</b>                                            |      |        |     |        |     |        | <b>&lt;0.001</b> |
| I; Well differentiated                                  | 408  | 5.36%  | 49  | 3.85%  | 63  | 5.01%  |                  |
| II; Moderately differentiated                           | 2405 | 31.62% | 428 | 33.62% | 410 | 32.62% |                  |
| III/IV; Poorly differentiated                           | 2970 | 39.05% | 690 | 54.20% | 703 | 55.93% |                  |
| Unknown                                                 | 1822 | 23.96% | 106 | 8.33%  | 81  | 6.44%  |                  |
| <b>Median household income<br/>(inflation adjusted)</b> |      |        |     |        |     |        | <b>&lt;0.001</b> |
| <50,000\$                                               | 844  | 11.10% | 145 | 11.39% | 202 | 16.07% |                  |
| 50,000-59,999\$                                         | 1148 | 15.10% | 206 | 16.18% | 225 | 17.90% |                  |
| 60,000-69,999\$                                         | 2589 | 34.04% | 462 | 36.29% | 392 | 31.19% |                  |
| ≥70,000\$                                               | 3024 | 39.76% | 460 | 36.14% | 438 | 34.84% |                  |
| <b>Radiotherapy</b>                                     |      |        |     |        |     |        | <b>&lt;0.001</b> |
| None/unknown                                            | 5438 | 71.51% | 513 | 40.30% | 766 | 60.94% |                  |
| Yes                                                     | 2167 | 28.49% | 760 | 59.70% | 491 | 39.06% |                  |
| <b>Distant metastases</b>                               |      |        |     |        |     | 0.00%  | <b>&lt;0.001</b> |
| Bone only                                               | 2290 | 30.11% | 546 | 42.89% | 511 | 40.65% |                  |
| Liver only                                              | 529  | 6.96%  | 152 | 11.94% | 162 | 12.89% |                  |
| Lung only                                               | 590  | 7.76%  | 159 | 12.49% | 145 | 11.54% |                  |
| Brain only                                              | 82   | 1.08%  | 12  | 0.94%  | 20  | 1.59%  |                  |
| Bone+Liver                                              | 805  | 10.59% | 67  | 5.26%  | 93  | 7.40%  |                  |
| Bone+Lung                                               | 644  | 8.47%  | 53  | 4.16%  | 73  | 5.81%  |                  |
| Bone+Brain                                              | 140  | 1.84%  | 5   | 0.39%  | 12  | 0.95%  |                  |
| Bone+Liver+Lung                                         | 430  | 5.65%  | 25  | 1.96%  | 32  | 2.55%  |                  |
| Liver+Lung                                              | 165  | 2.17%  | 23  | 1.81%  | 30  | 2.39%  |                  |
| Brain+Other                                             | 492  | 6.47%  | 19  | 1.49%  | 35  | 2.78%  |                  |
| Other metastases                                        | 1438 | 18.91% | 212 | 16.65% | 144 | 11.46% |                  |

---

Brain+other: cases of brain metastases combined with other metastases except for the bone+brain, e.g. brain+liver etc. Other metastases: other cases of metastases than those listed in the table.





|                         |      |        |     |        |     |              |
|-------------------------|------|--------|-----|--------|-----|--------------|
| No                      | 1018 | 75.18% | 510 | 75.33% | 500 | 73.86%       |
| Yes                     | 330  | 24.37% | 164 | 24.22% | 177 | 26.14%       |
| Unknown                 | 6    | 0.44%  | 3   | 0.44%  | 0   | 0.00%        |
| <b>Lung metastases</b>  |      |        |     |        |     | <b>0.458</b> |
| No                      | 1017 | 75.11% | 514 | 75.92% | 499 | 73.71%       |
| Yes                     | 332  | 24.52% | 157 | 23.19% | 175 | 25.85%       |
| Unknown                 | 5    | 0.37%  | 6   | 0.89%  | 3   | 0.44%        |
| <b>Brain metastases</b> |      |        |     |        |     | <b>0.132</b> |
| No                      | 1318 | 97.34% | 659 | 97.34% | 648 | 95.72%       |
| Yes                     | 32   | 2.36%  | 14  | 2.07%  | 27  | 3.99%        |
| Unknown                 | 4    | 0.30%  | 4   | 0.59%  | 2   | 0.30%        |

---
